# Supplementary material
Source: PubMed Central journal article supplement (PMC5913965)
Supplement: AAC.02585-17_zac004187000s1.pdf [file AAC.02585-17_zac004187000s1.pdf]

# SUPPLEMENTARY MATERIAL

## Supplementary Methods and Results

**Bacterial strains.** *Acinetobacter baumannii* strains were obtained from the FDA-CDC Antimicrobial Resistance Isolate Bank (Atlanta, GA) and the Military Resistance Surveillance Network (MRSN) at the Walter Reed Army Institute of Research (WRAIR; Silver Spring, MD). MIC data for antimicrobials other than apramycin was determined using a Sensititre GNX35 microdilution panel (Thermo Scientific, Waltham, MA) and interpreted using Clinical and Laboratory Standards Institutes (CLSI) criteria (1). Apramycin MICs were determined using CLSI reference broth microdilution methodology (2).

To identify *A. baumannii* strains suitable for pharmacodynamic studies in neutropenic mice, we selected twelve strains with apramycin MICs ranging from 2 to 64  $\mu\text{g ml}^{-1}$  (3), injected  $10^6$  CFU into murine thighs, and harvested tissue 24 hours later for CFU enumeration. In six strains, recovered CFU exceeded inoculum (see Table S1). From this latter set, three virulent strains were chosen for further experiments.

The first (MRSN7465) was multidrug-resistant (MDR), and the latter two (MRSN1450, FDA-CDC 278) were extensively drug-resistant (XDR) based on consensus criteria (4). More specifically, MRSN7465 was resistant to gentamicin and tobramycin, but susceptible to amikacin, doxycycline/minocycline, quinolones, sulbactam, and polymyxins. MRSN1450 was resistant to carbapenems, aminoglycosides and quinolones, but remained susceptible to doxycycline/minocycline, polymyxins, and sulbactam (1). FDA-CDC 278 was susceptible only to polymyxins.

24           **Animals.** CD-1 (ICR) female mice weighing 25-30g each were purchased from Charles  
25 River Laboratories, Inc. (Kingston, NY). Group size was three for each data point unless  
26 otherwise indicated.

27           **Single-dose maximum tolerated dose (MTD) determination.** Mice were injected  
28 intraperitoneally (IP) with 0, 20, 50, 100, 200, 500, 1000, 1500, or 3000 mg kg<sup>-1</sup> apramycin (Alfa  
29 Aesar, Tewksbury, MA, USA). On day 3 post apramycin dosing, 100 µl of blood was collected  
30 in heparinized capillary tubes (Fisher Healthcare, Waltham, MA). Mice were immediately  
31 euthanized, and organs harvested and fixed in 10% neutral buffered formalin for histological  
32 evaluation.

33           **Multi-dose MTD determination.** Mice were injected IP with 500 mg kg<sup>-1</sup> of apramycin  
34 for 14 consecutive days and observed for weight changes, morbidity, and mortality. Kidney and  
35 liver tissues were fixed for histological evaluation (see Fig S1).

36           **Serum Creatinine Determination.** Plasma creatinine was measured by high  
37 performance chromatography coupled to tandem mass spectrometry on a Shimadzu UFLC liquid  
38 chromatography system and API 5000 triple quadrupole mass spectrometer (Sciex, Framingham,  
39 MA). Calibrators were made from creatinine dissolved in phosphate buffered saline. Plasma  
40 samples and calibrators were first mixed with an equal volume of 0.1 mg dL<sup>-1</sup> <sup>13</sup>C isotopically  
41 labeled creatinine internal standard. Samples were deproteinized by mixing with an equal  
42 volume of trichloroacetic acid, acetonitrile, and water (15:42.5:42.5) and centrifuged for 10  
43 minutes at 14,000 rpm. 10 microliters of extracted supernatant was injected onto a Kinetex 150 x  
44 2.1 mm C18 HPLC column (Phenomenex, Torrance, CA), eluted with 20 mM ammonium  
45 formate and 0.1% formic acid in Milli-Q (MilliporeSigma, Burlington, MA) purified water, and

46 creatinine and its isotopic standard were measured by multiple reaction monitoring using  
47 transitions  $m/z$  114.1>44 and 115.1>45 respectively. All chemicals were purchased from Sigma-  
48 Aldrich (Saint Louis, MO).

49 **Pharmacokinetic (PK) and pharmacodynamic (PD) studies.** Neutropenia was induced  
50 through IP injection of 150 mg kg<sup>-1</sup> or 100 mg kg<sup>-1</sup> cyclophosphamide (Sigma-Aldrich) in 100  $\mu$ l  
51 sterile saline four days and one day prior to PK and PD experiments, respectively. Uranyl nitrate  
52 (Electron Microscopy Sciences, Hatfield, PA) was also injected IP at 5 mg kg<sup>-1</sup> three days prior  
53 to PK and PD experiments, as previously described, to establish renal clearance more closely  
54 resembling that in humans (5). For PK analysis, apramycin was injected subcutaneously at 20, 80,  
55 or 500 mg kg<sup>-1</sup>. Blood was collected from the mouse tail vein immediately prior to and at 0.5, 1,  
56 3, 5, 8, 24 hours post injection with heparinized capillary tubes and centrifuged at 1500 relative  
57 centrifugal force for 10 minutes. Plasma was frozen at -20°C for subsequent analysis to  
58 determine apramycin levels. Both AUC and C<sub>max</sub> are expressed as the mean and standard  
59 deviations of determinations from three (20 and 80 mg kg<sup>-1</sup>) or four (500 mg kg<sup>-1</sup>) mice per  
60 dosing group.

61 **Apramycin/Tobramycin LC-MS/MS method.** Plasma samples were thawed, and 10  $\mu$ L  
62 of plasma was mixed with 10  $\mu$ L of tobramycin internal standard dissolved in phosphate  
63 buffered saline at concentration of 10  $\mu$ g mL<sup>-1</sup> (Sigma-Aldrich). Apramycin and tobramycin  
64 internal standard were extracted by protein precipitation by mixing with an equal volume of  
65 precipitation solution comprised of trichloroacetic acid, acetonitrile, and water (15:42.5:42.5 v/v).  
66 Proteins were pelleted by centrifugation and supernatant was transferred to 96-well plate for  
67 analysis. Assays were calibrated using apramycin dissolved in phosphate buffered saline.

68 Methodology for apramycin quantification was adapted from a previously described  
69 tobramycin assay (6). Specifically, 10 microliters of deproteinized plasma and internal standard  
70 was injected by autosampler for analysis. Apramycin and internal standard were resolved using  
71 ion pairing chromatography and measured using multiple reaction monitoring (MRM) tandem  
72 mass spectrometry (intra-assay CV 2.9%). Liquid chromatography was performed using a  
73 Kinetex C18 HPLC column, 3.0 x 50 mm, 2.6  $\mu\text{m}$  bead size, (Phenomenex, Torrence, CA) on a  
74 Shimadzu Prominence UPLC with autosampler (Shimadzu Scientific Instruments, Columbia,  
75 MD). Analytes were resolved using a gradient of 20 mM heptafluorobutyric acid (HFBA) in  
76 water (buffer A) and eluted with 20 mM HFBA in acetonitrile (buffer B). For metabolite  
77 monitoring, the HPLC was coupled to an API 5000 triple quadrupole mass spectrometer with  
78 Turbo V electrospray ion source (Sciex, Framingham, MA). MRM spectra were acquired using  
79 Analyst 1.6 software and peaks were quantified by their areas under the curve (AUC).  
80 Apramycin AUC values were normalized by dividing by the AUC values for their respective  
81 tobramycin internal standard peaks. Apramycin calibrator solutions (0 – 100  $\mu\text{g mL}^{-1}$ ) were  
82 measured in the same fashion, and the resulting standard curve was used to convert normalized  
83 AUC values into apramycin concentrations. Additional liquid chromatography and mass  
84 spectrometer settings are detailed in Table S2 and Fig S2.

85

**Table S1. Growth of selected *A. baumannii* strains in the murine neutropenic thigh model.**

| <i>A. baumannii</i> Strain | Apramycin MIC ( $\mu\text{g ml}^{-1}$ ) | CFU thigh <sup>-1</sup>             |
|----------------------------|-----------------------------------------|-------------------------------------|
| <b>MRSN7465</b>            | <b>2</b>                                | <b><math>1.2 \times 10^8</math></b> |
| MRSN0915                   | 2                                       | No Growth <sup>a</sup>              |
| MRSN7520                   | 4                                       | No Growth                           |
| MRSN11712                  | 4                                       | No Growth                           |
| MRSN7112                   | 8                                       | $5 \times 10^6$                     |
| MRSN7322                   | 8                                       | No Growth                           |
| MRSN15067                  | 16                                      | $6 \times 10^7$                     |
| <b>MRSN1450</b>            | <b>16</b>                               | <b><math>6 \times 10^7</math></b>   |
| FDA-CDC0298                | 32                                      | No Growth                           |
| MRSN2400                   | 32                                      | $5 \times 10^7$                     |
| <b>FDA-CDC0278</b>         | <b>64</b>                               | <b><math>2 \times 10^6</math></b>   |
| MRSN15081                  | 64                                      | No Growth                           |

Strains selected for *in vitro* and *in vivo* experiments highlighted in bold.

<sup>a</sup>Limit of detection =  $1 \times 10^6$  CFU per thigh.

**Table S2. Metabolite MRM transitions, mass spectrometer and liquid chromatography settings.**

| <b>Ion source settings</b>                                          |                        |                            |
|---------------------------------------------------------------------|------------------------|----------------------------|
| Curtain gas: 17                                                     | GS1: 40                | GS2: 40                    |
| Ion spray voltage: +2500V                                           | Source temp: 200°C     | Positive ion mode          |
| <b>MS settings</b>                                                  |                        |                            |
| Declustering potential: 100                                         | Entrance potential: 10 | Collision energy: 35       |
| Collision gas: 7                                                    | CXP: 16                |                            |
| <b>MRM mass transitions (parent ion m/z -&gt; daughter ion m/z)</b> |                        |                            |
| Apramycin (quantifier)                                              | Apramycin (qualifier)  | Tobramycin internal stand. |
| 540.6 > 217.2                                                       | 540.6 > 199.0          | 468.2 > 163.3              |
| <b>HPLC gradient elution program (flow rate 0.6 mL/min)</b>         |                        |                            |
| Time (min)                                                          | % Buffer B             |                            |
| 0                                                                   | 5%                     |                            |
| 0 – 3.5                                                             | 5% - 35% gradient      |                            |
| 3.6 – 3.9                                                           | 100% wash              |                            |
| 4 - 6                                                               | 5% re-equilibration    |                            |

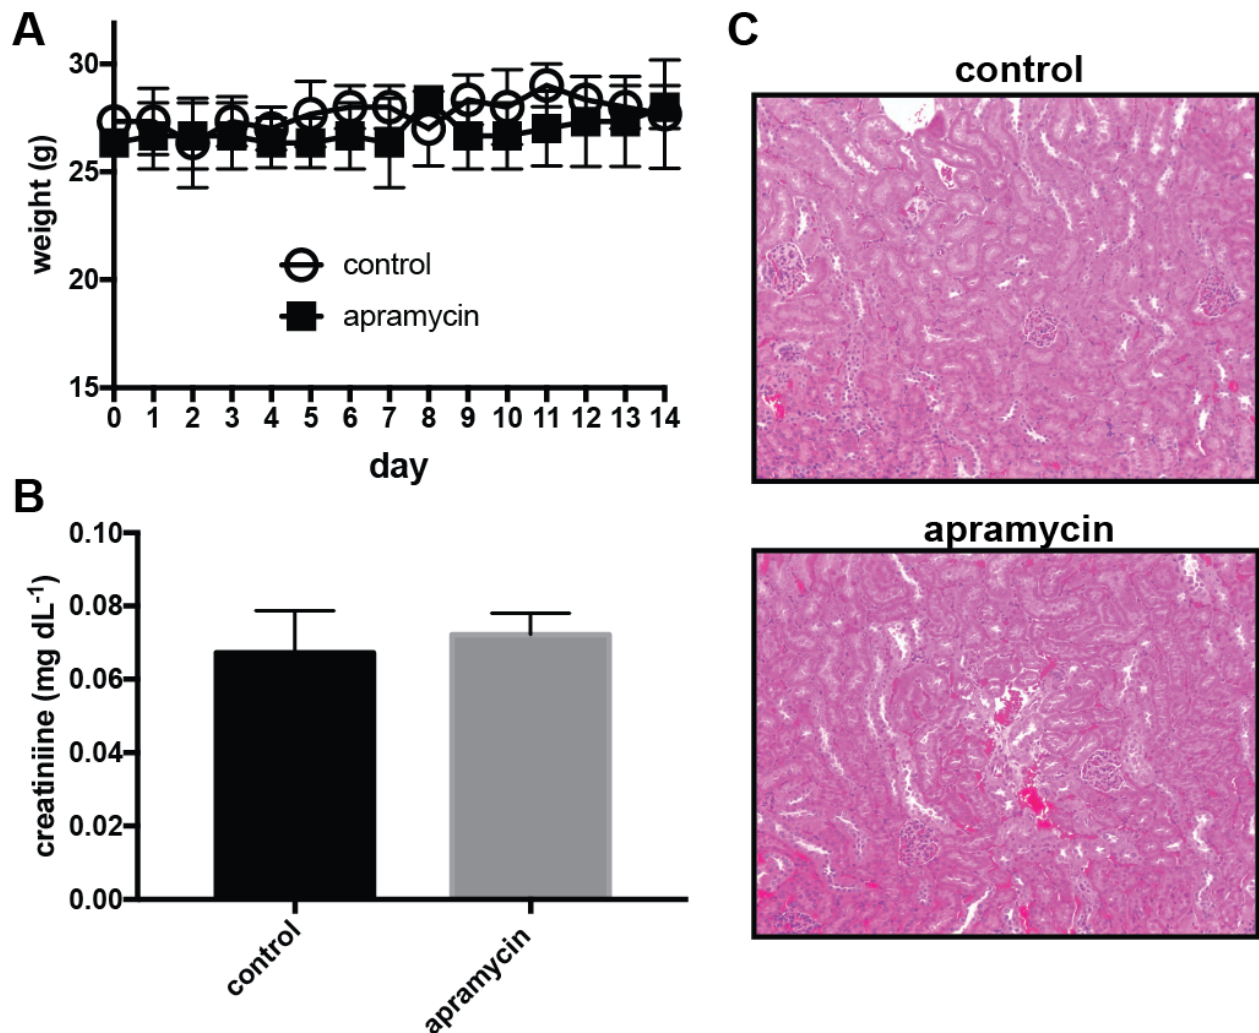

**Figure S1. Maximum-tolerated dose.** CD-1 mice were dosed with 500 mg kg<sup>-1</sup> IP each day for 14 days. **(A)** Apramycin treated mice and controls showed no difference in body weight during the course of the experiment. **(B)** Plasma creatinine measurements were also indistinguishable when measured 24 h after the final apramycin dose. **(C)** There was no evidence of pathology in kidney tubules.

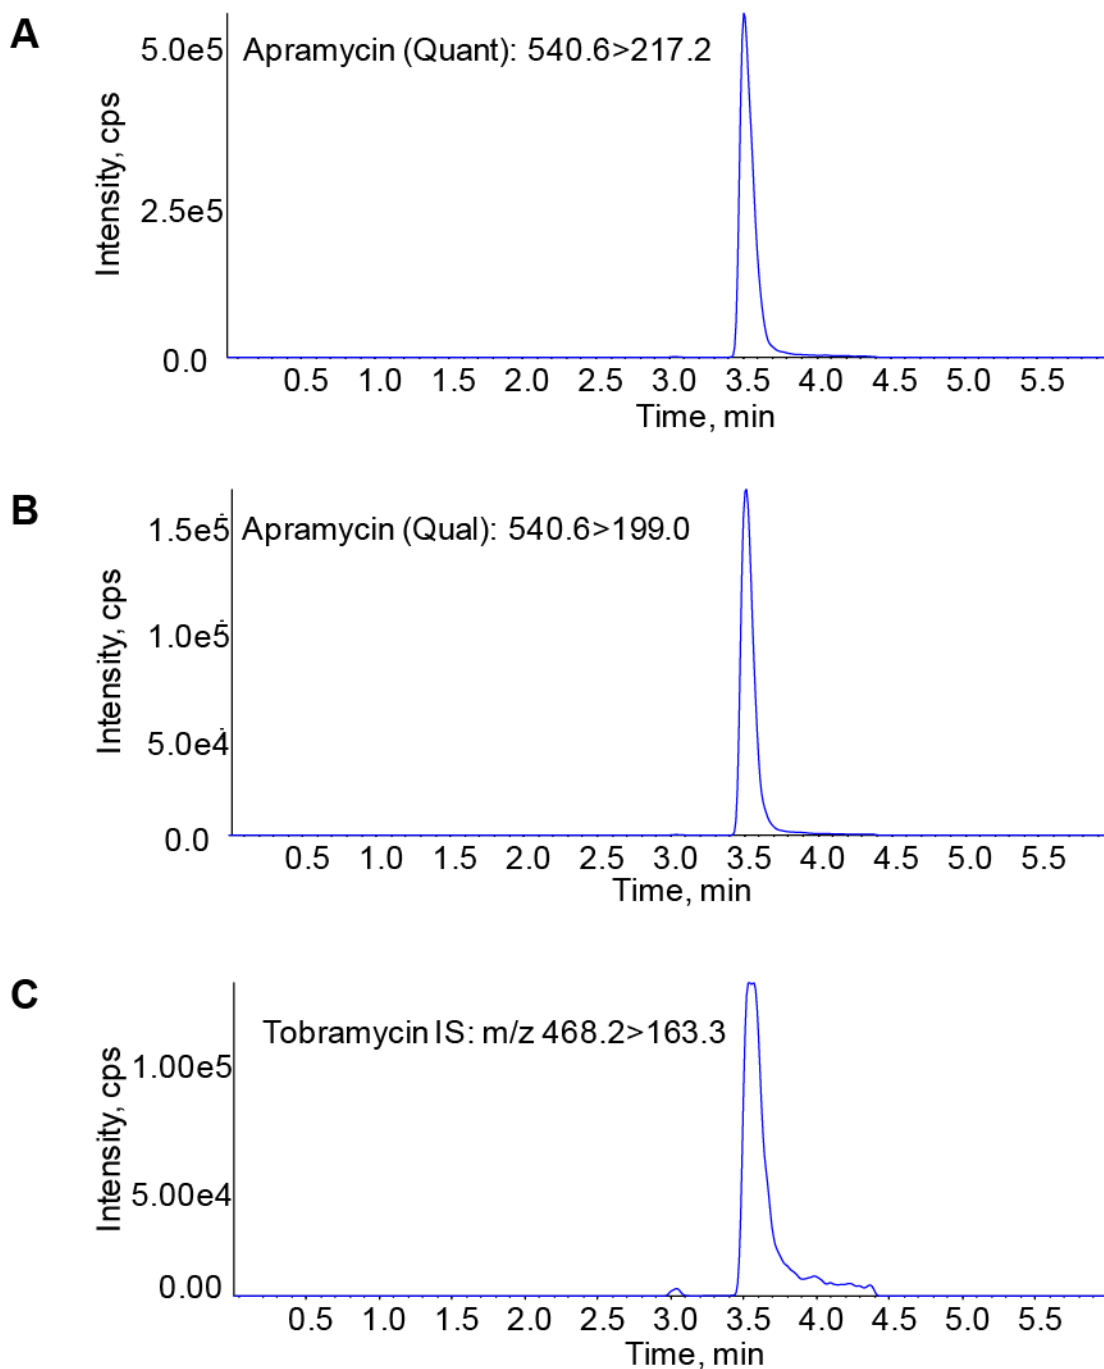

**Figure S2. LC-MS/MS chromatograms of apramycin and tobramycin internal standard multiple reaction monitoring peaks. (A)** Transition 540.6>217.2 was used to quantify apramycin. **(B)** Transition 540.6>199.0 was included as a confirmatory qualifier peak for apramycin. **(C)** Transition 468.2>163.3 was used to monitor tobramycin internal standard.



## Supplementary References

1. **Clinical and Laboratory Standards Institute.** 2017. Performance standards for antimicrobial susceptibility testing; twenty-sixth informational supplement. CLSI document M100-S27. Clinical and Laboratory Standards Institute, Wayne, PA.
2. **Clinical and Laboratory Standards Institute.** 2015. Methods for dilution antimicrobial susceptibility tests for bacteria that grow aerobically; approved standard - tenth edition. CLSI document M07-A10. Clinical and Laboratory Standards Institute, Wayne, PA.
3. **Kang AD, Smith KP, Eliopoulos GM, Berg AH, McCoy C, Kirby JE.** 2017. *In vitro* Apramycin Activity against multidrug-resistant *Acinetobacter baumannii* and *Pseudomonas aeruginosa*. *Diagn Microbiol Infect Dis* **88**:188-191.
4. **Magiorakos AP, Srinivasan A, Carey RB, Carmeli Y, Falagas ME, Giske CG, Harbarth S, Hindler JF, Kahlmeter G, Olsson-Liljequist B, Paterson DL, Rice LB, Stelling J, Struelens MJ, Vatopoulos A, Weber JT, Monnet DL.** Multidrug-resistant, extensively drug-resistant and pandrug-resistant bacteria: an international expert proposal for interim standard definitions for acquired resistance. *Clin Microbiol Infect* **18**:268-281.
5. **Andes D, Craig WA.** 1998. In Vivo Activities of Amoxicillin and Amoxicillin-Clavulanate against *Streptococcus pneumoniae*: Application to Breakpoint Determinations. *Antimicrob Agents Chemother* **42**:2375-2379.
6. **Bernardi PM, Barreto F, Dalla Costa T.** 2017. Application of a LC-MS/MS method for evaluating lung penetration of tobramycin in rats by microdialysis. *J Pharm Biomed Anal* **134**:340-345.
